# Supplementary material for: Extracellular vesicles of U937 macrophage cell line infected with DENV-2 induce activation in endothelial cells EA.hy926
Source: PubMed Central journal article supplement (PMC6946137; doi:10.1371/journal.pone.0227030), 2020-01-07
Supplement: pone.0227030.s001.pdf [file pone.0227030.s001.pdf]

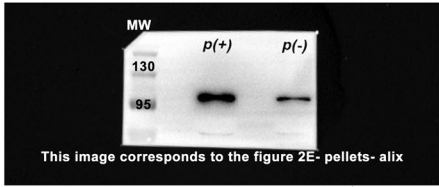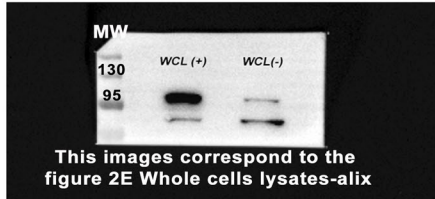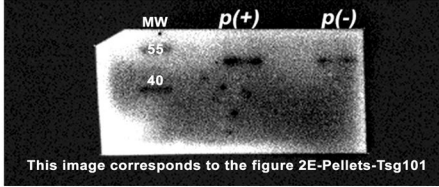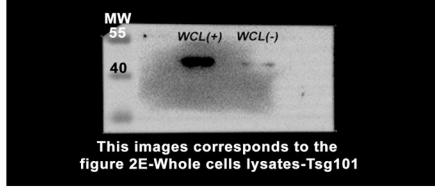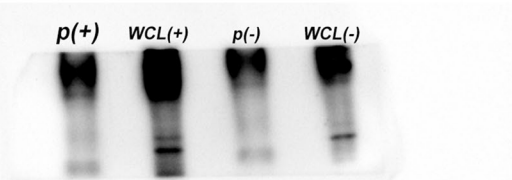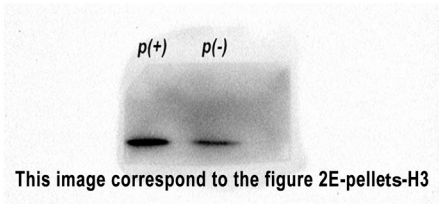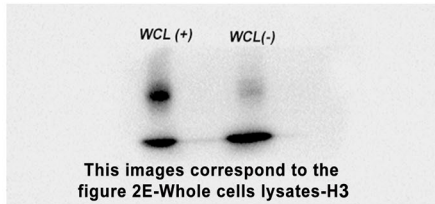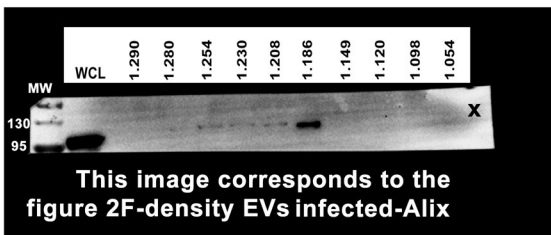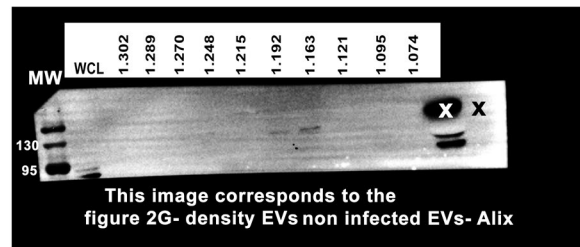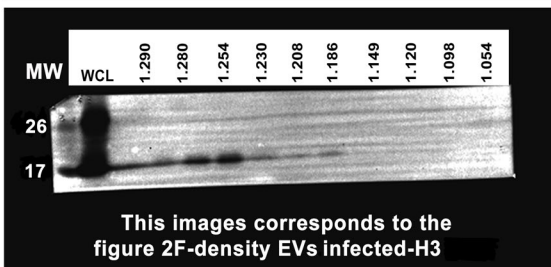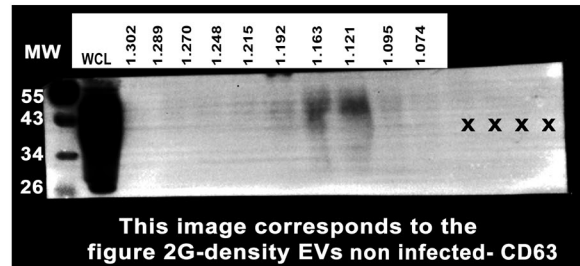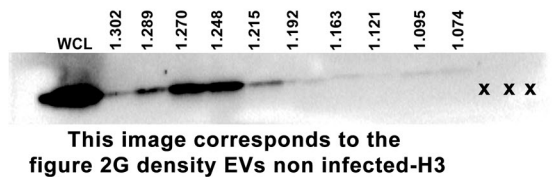



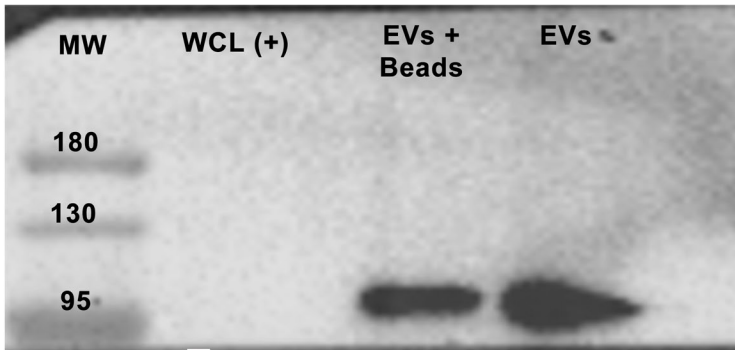

**This image corresponds to the figure suppl 1- EVs IP- Alix**

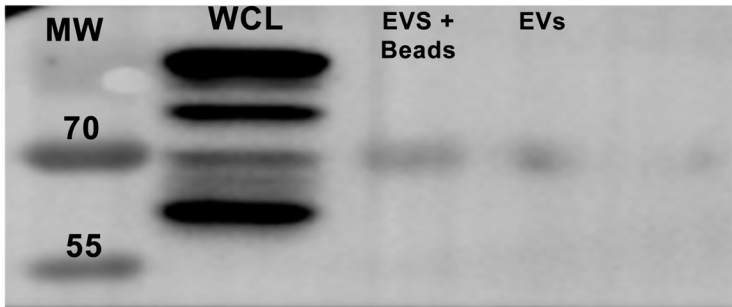

**This image corresponds to the figure suppl 1- EVs IP- NS3**

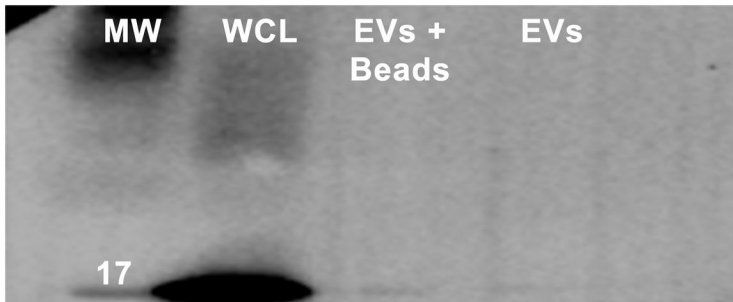

**This image corresponds to the figure suppl 1- EVs IP- h3**
